# Supplementary material for: Parkinson’s disease-associated LRRK2-G2019S mutant acts through regulation of SERCA activity to control ER stress in astrocytes
Source: Acta Neuropathol Commun. 2019 May 2;7:68. doi: 10.1186/s40478-019-0716-4 (PMC6498585; doi:10.1186/s40478-019-0716-4)
Supplement: Supplementary file 2 — Figure S1. The LRRK2-GS mutant induces ER stress and apoptosis in tunicamycin-treated astrocytes. Figure S2. LRRK2-GS is localized to the ER membrane. Figure S3. Analysis of GS-LRRK2–interacting proteins. Figure S4. Identification of GS-LRRK2–interacting proteins. Figure S5. LRRK2-GS promotes SERCA–PLN complex formation. Figure S6. LRRK2 kinase activity does not affect LRRK2 localization. Figure S7. LRRK2-GS astrocytes affect neuronal survival. Table S2. List of siRNA oligonucleotides. Table S3. List of primers used for qPCR. Table S4. List of primary antibodies used in this work. (PDF 5703 kb) [file 40478_2019_716_MOESM2_ESM.pdf]

**Parkinson's disease-associated LRRK2-G2019S mutant acts through regulation of SERCA activity to control ER stress in astrocytes**

Jee Hoon Lee, Ji-hye Han, Hyunmi Kim, Sang Myun Park, Eun-hye Joe and Ilo Jou\*

Department of Pharmacology, and Chronic Inflammatory Disease Research Center, Ajou University  
School of Medicine, Suwon, Korea, 16499

\* Correspondence: Ilo Jou (jouilo@aumc.ac.kr)

The supplementary material comprises figures S1-S7 and supplementary tables 1-2.

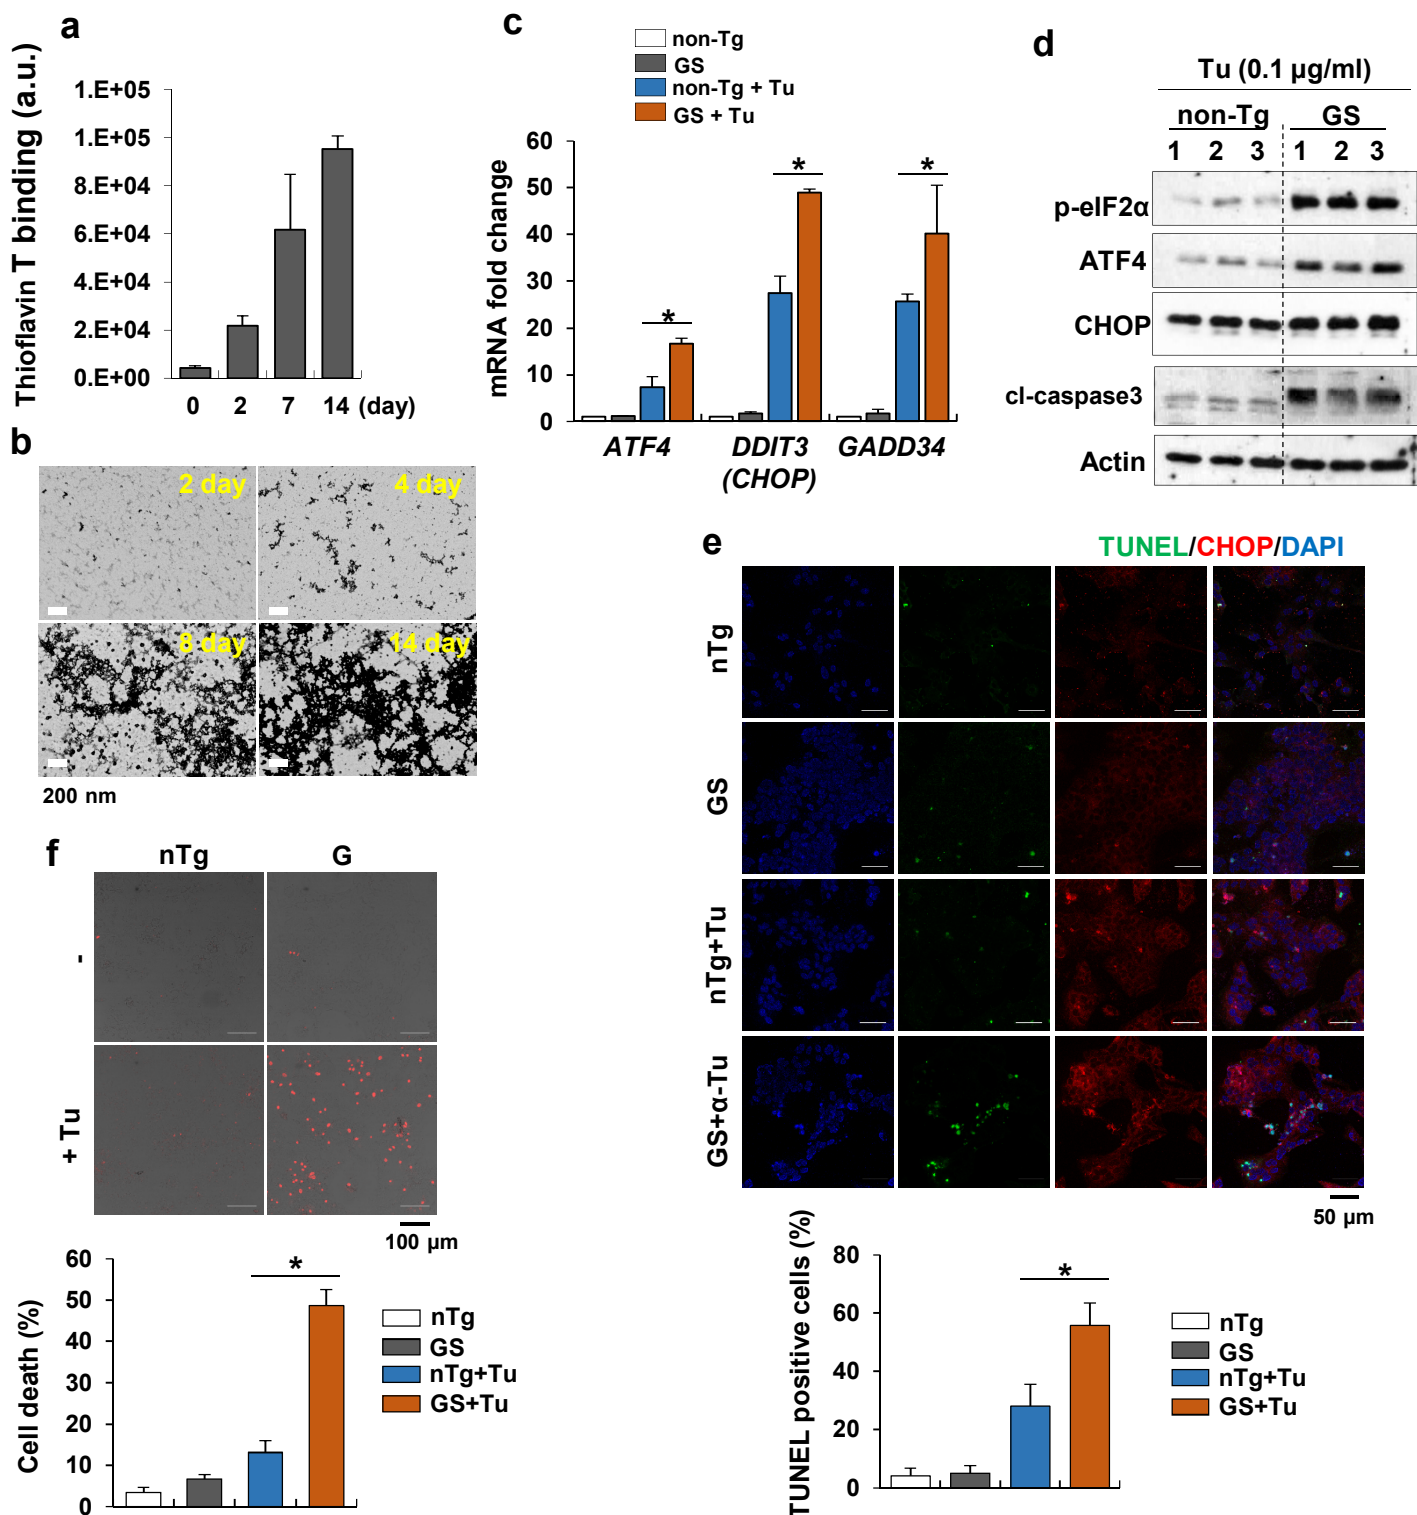

**Fig. S1 The LRRK2-GS mutant induces ER stress and apoptosis in tunicamycin-treated astrocytes.** Related to Figure 1

**a, b** Endotoxin-free recombinant human  $\alpha$ -synuclein were incubated for 14 d. At the indicated time points, small aliquots were analyzed using thioflavin T binding assays (**a**) and observed under electron microscopy (**b**). **c, d** Astrocytes isolated from non-Tg (nTg) and LRRK2-GS (GS) mice were treated with tunicamycin (Tu) for 24–48 h. Expression levels of the indicated mRNAs (**c**) and proteins (**d**) were analyzed by real-time qPCR and Western blotting, respectively. **e, f** Representative images and summary data showing TUNEL staining (**e**) and live/dead staining (**f**) of non-Tg and LRRK2-GS astrocytes 72 h after treatment with Tu. All data are presented as means  $\pm$  SD of three independent experiments (\* $p < 0.05$ ).

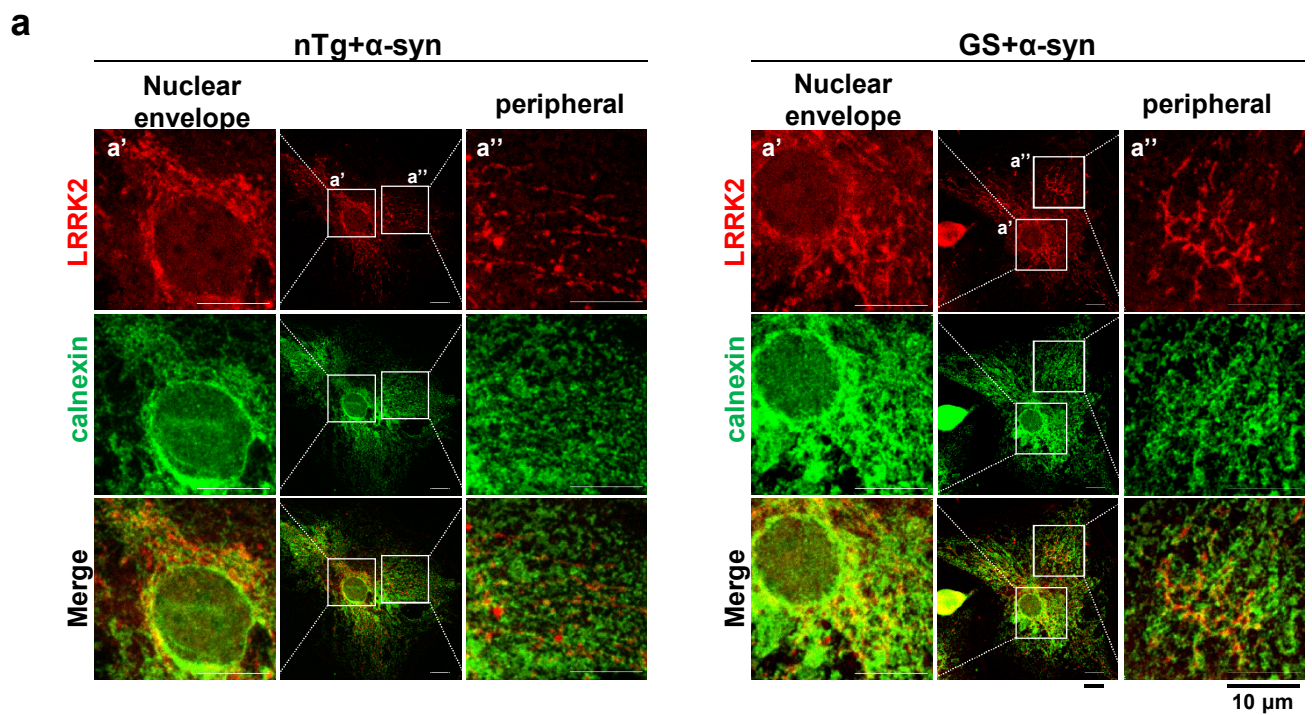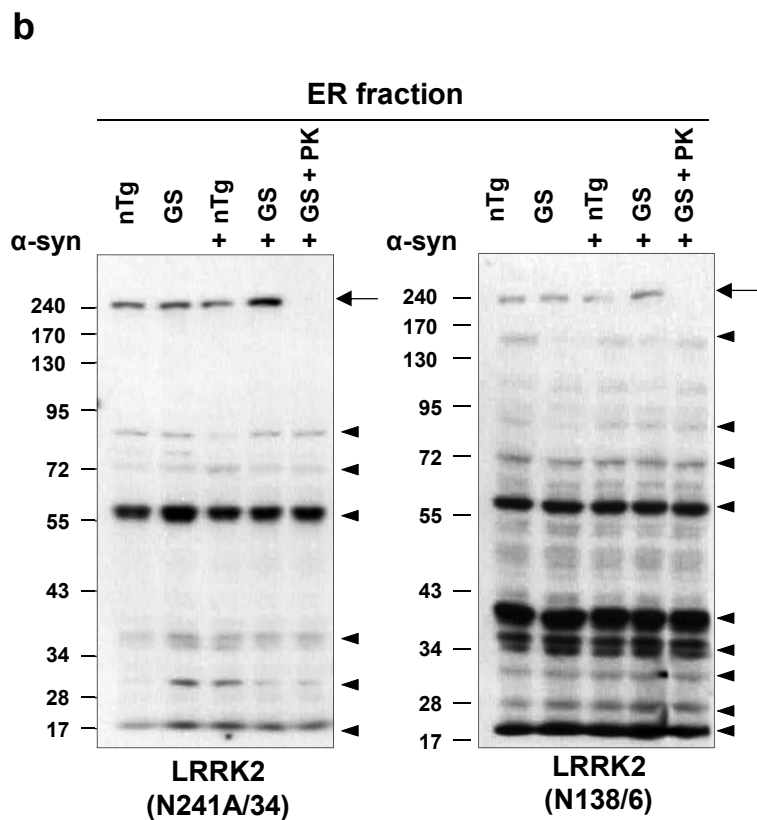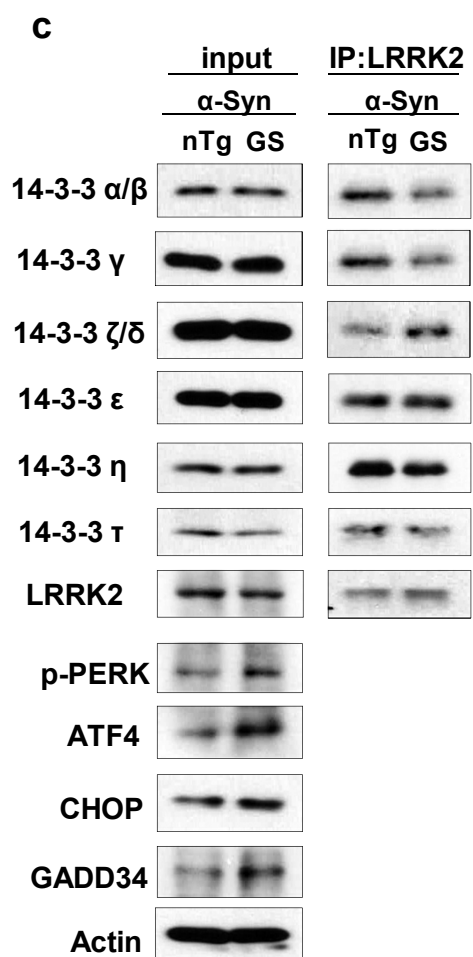

**Fig. S2 LRRK2-GS is localized to the ER membrane.** Related to Figure 2

**a** Confocal images of endogenous LRRK2 and calnexin in astrocytes isolated from non-Tg and LRRK2-GS mice. Magnification of insets in A to show the localization of LRRK2 in nuclear envelope (a') and peripheral ER regions (a''). **b** Western blot of LRRK2 in ER-enriched fractions from non-Tg and LRRK2-GS astrocytes incubated with or without proteinase K (PK). LRRK2 was detected using antibodies against the C- or N-terminal of LRRK2 (N241A/34 and N138/6, respectively). Arrowheads indicate non-specific bands, and arrow indicates LRRK2. **c** Immunoprecipitation of LRRK2 in non-Tg and LRRK2-GS astrocytes, followed by Western blotting for the indicated proteins.

a

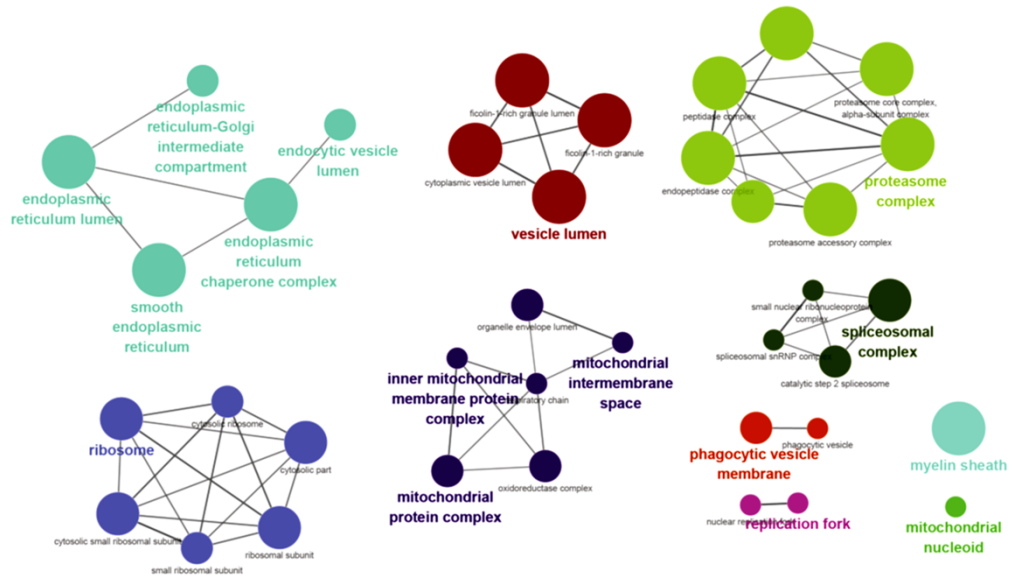

### GO\_Cellular Component

% associated genes/Term

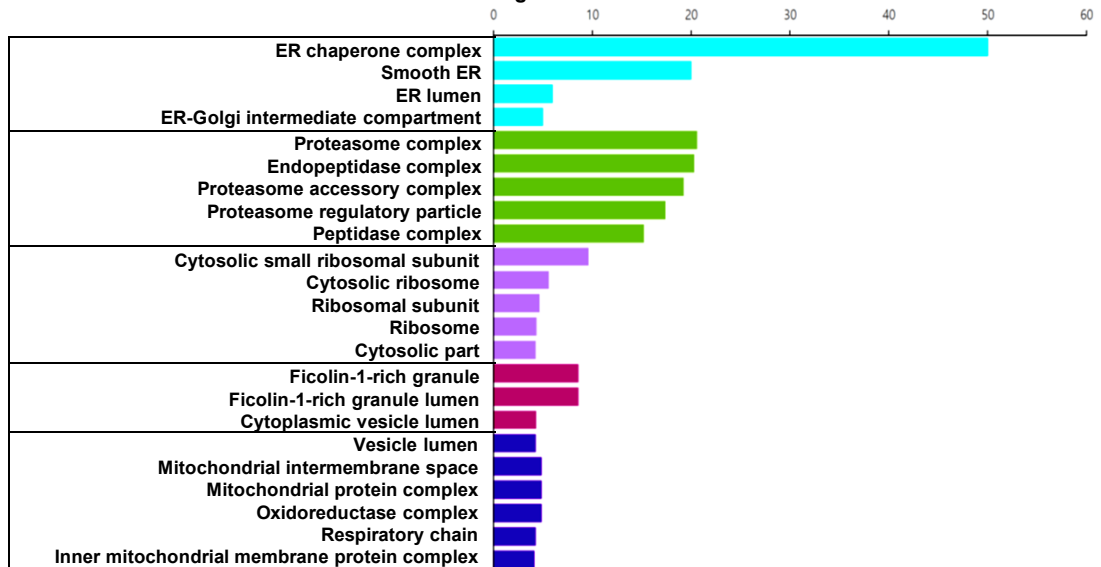

b

### GO\_Biological Process

% associated genes/Term

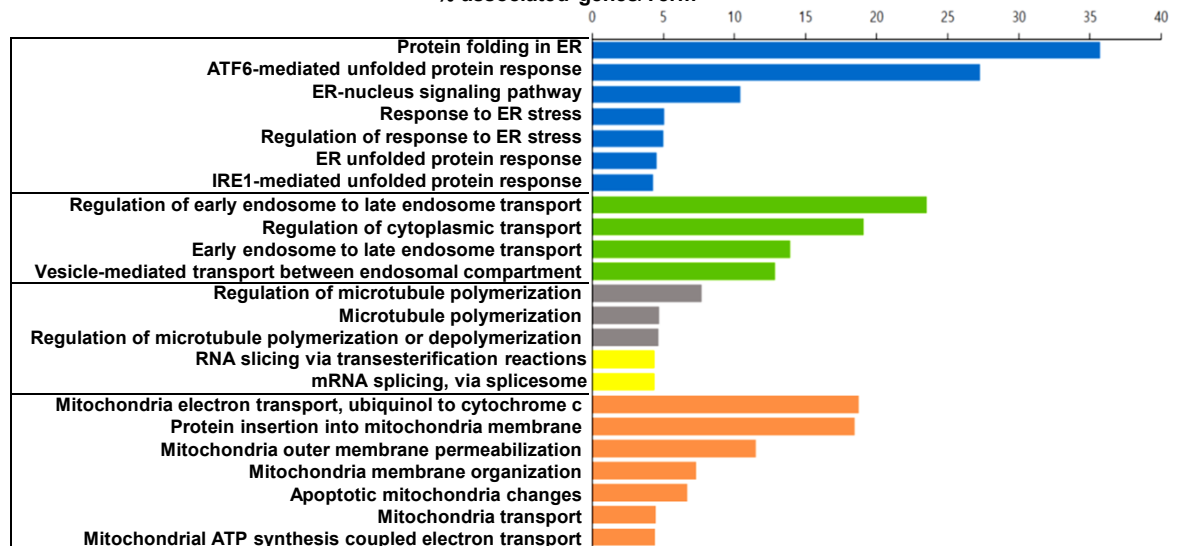

**Fig. S3 Analysis of GS-LRRK2–interacting proteins.** Related to Figure 3

**a** Cytoscape network analysis of LRRK2-GS–interacting proteins showing the five major Cellular Component groups identified. Each group consists of nodes (Cellular Component) connected to indicate relationships between nodes; each group is headed by its statistically most represented Cellular Component. **b** Identified LRRK2-GS–interacting proteins, grouped according to Biological Process categories.

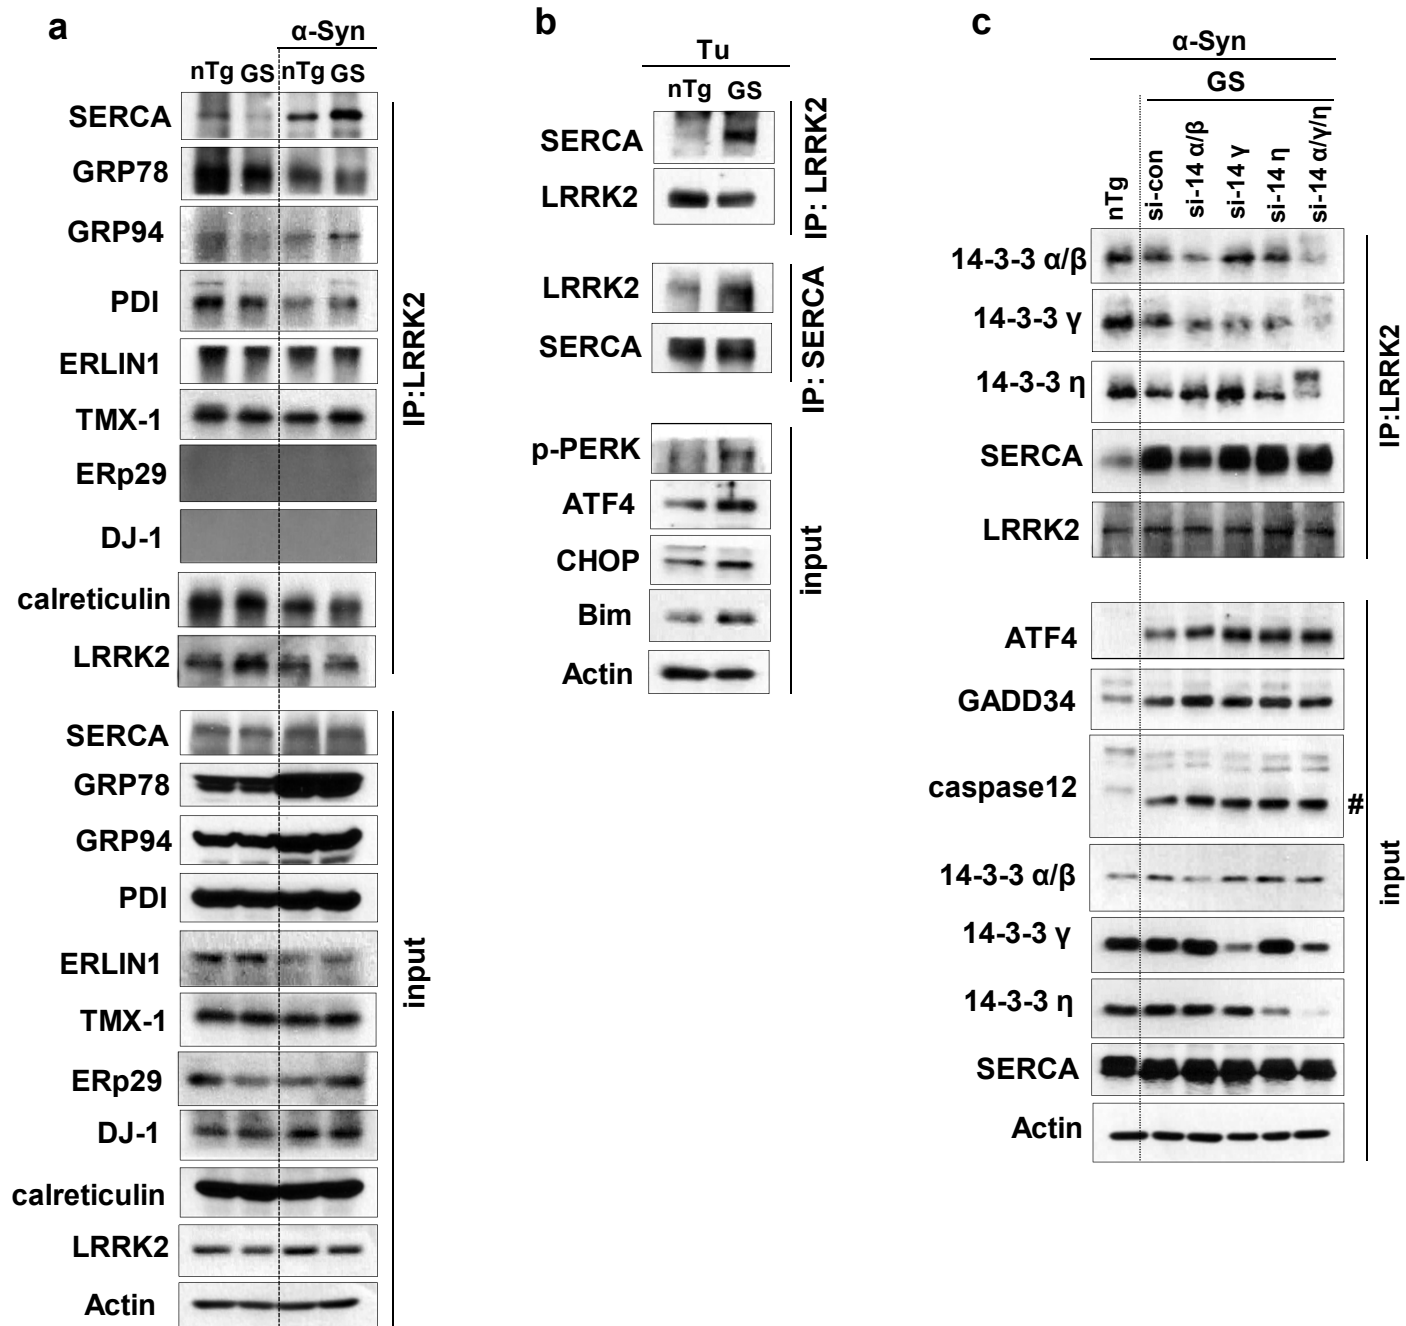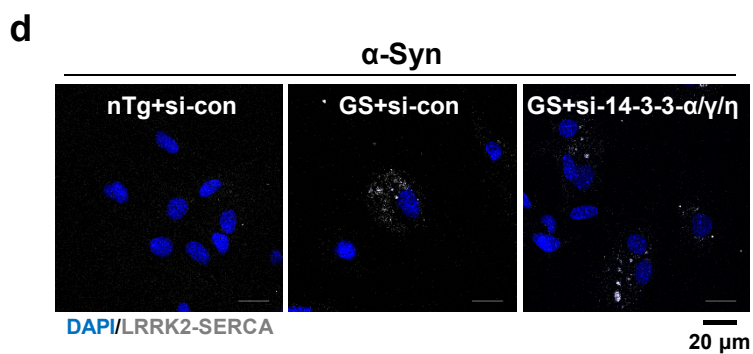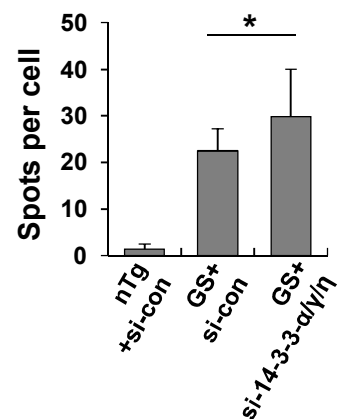

**Fig. S4 Identification of GS-LRRK2–interacting proteins.** Related to Figure 3

**a, b** Non-Tg and LRRK2-GS astrocytes were treated with  $\alpha$ -synuclein ( $\alpha$ -Syn) (a) or tunicamycin (Tu) (b) for 24 h and then immunoprecipitated with an antibody against LRRK2 or SERCA, followed by immunoblot analysis with the indicated antibodies. **c, d** Non-Tg and LRRK2-GS astrocytes were transfected with si RNAs against each 14-3-3 subtype. After 24 h, cells were treated with  $\alpha$ -Syn for 24 h. Protein interactions were assessed by immunoprecipitation with an antibody against LRRK2 followed by Western blotting with the indicated antibodies (c); LRRK2–SERCA interactions were detected using the PLA method (d). Crosshatching denotes the cleaved caspase-12 band. PLA signals (in gray) were counted and presented graphically as the average number of spots. Data are presented as means  $\pm$  SD of three independent experiments (\* $p < 0.05$ ).

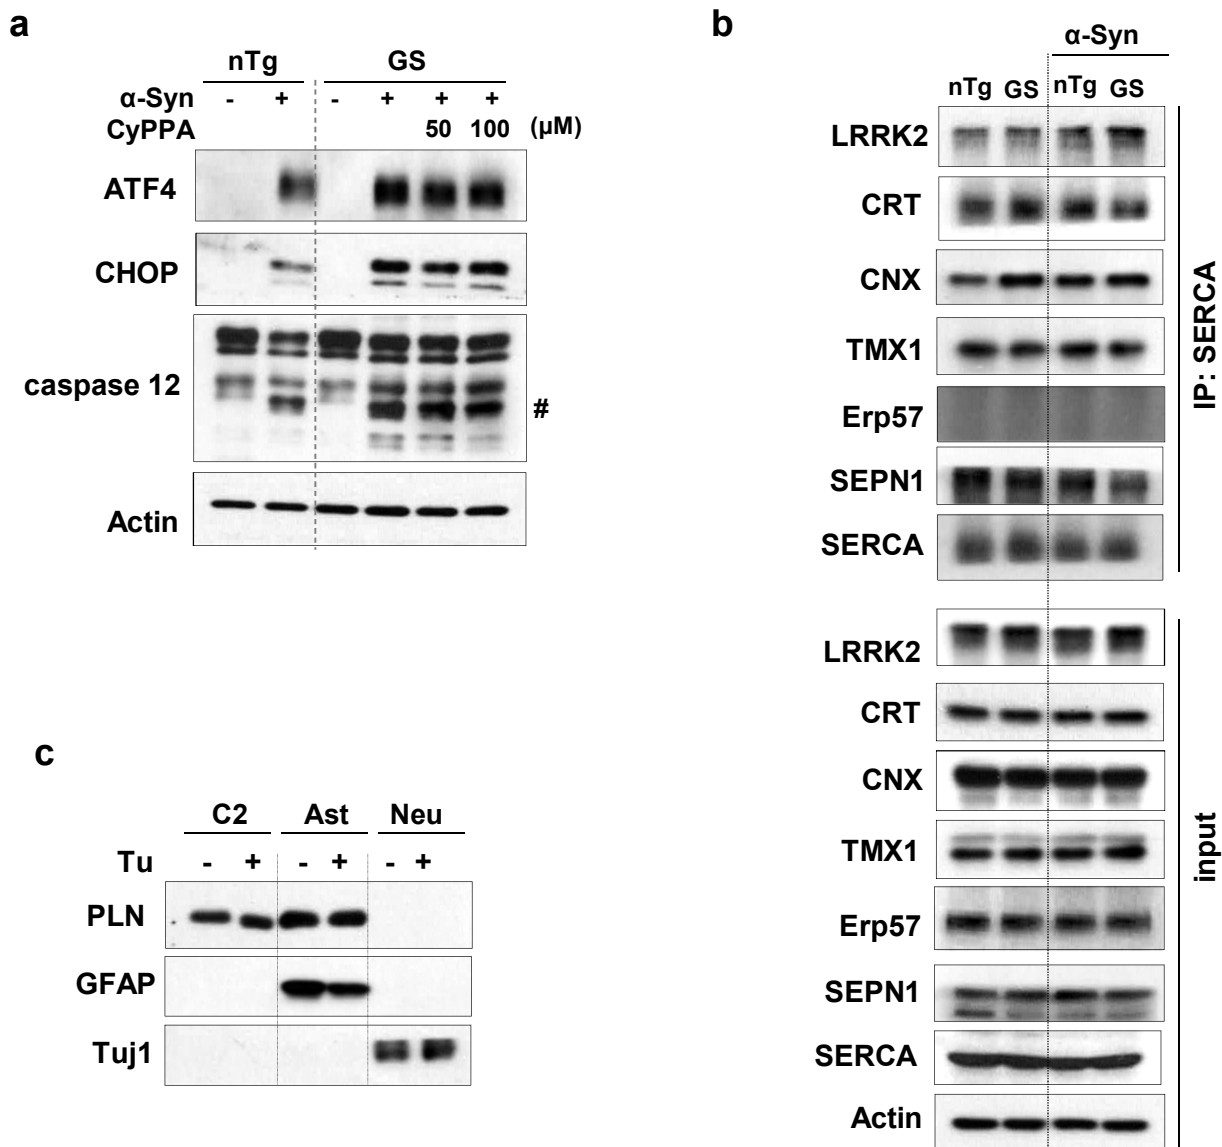

**Fig. S5 LRRK2-GS promotes SERCA-PLN complex formation.** Related to Figure 4

**a** Non-Tg and LRRK2-GS astrocytes were treated with  $\alpha$ -synuclein ( $\alpha$ -Syn) with or without CyPPA, a positive modulator of the SK2 channel. The indicated protein levels were analyzed by Western blotting. Crosshatching denotes the cleaved caspase-12 band. **b** Non-Tg and LRRK2-GS astrocytes were treated with  $\alpha$ -Syn and immunoprecipitated with an antibody against SERCA, followed by immunoblot analysis with the indicated antibodies. **c** C2 myoblasts (C2), astrocytes (Ast) and primary neurons (Neu) were incubated with or without Tu for 24 h, after which levels of the indicated proteins were analyzed by Western blotting.

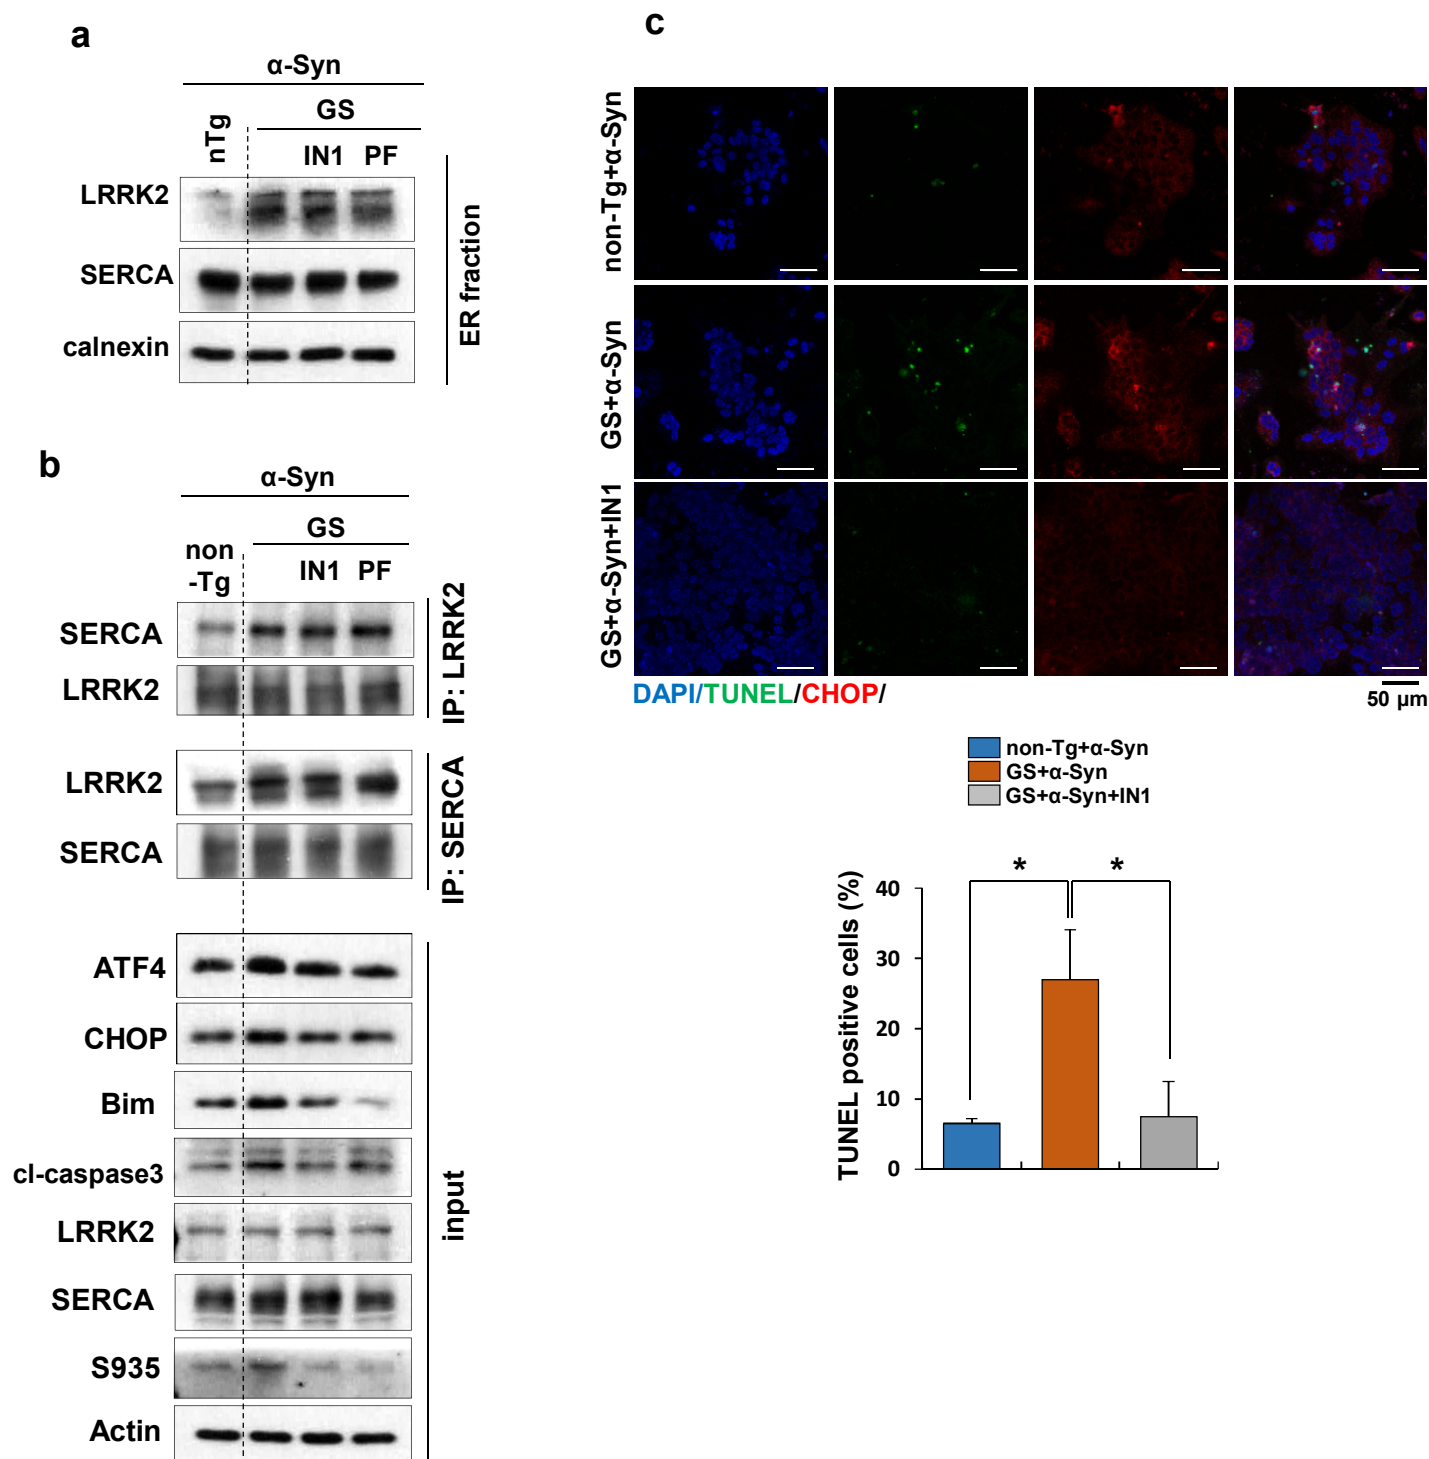

**Fig. S6 LRRK2 kinase activity does not affect LRRK2 localization.**

**a** Western blots of the indicated proteins in ER-enriched fractions from non-Tg and LRRK2-GS astrocytes. **b** non-Tg and LRRK2-GS astrocytes were pretreated with 100 nM IN1 (Calbiochem) or 1  $\mu$ M PF-06447475 (PF) (Sigma) for 10 min before  $\alpha$ -synuclein addition. After that, cell lysates were immunoprecipitated with the indicated antibodies, followed by immunoblot analysis. **c** Representative images and summary data showing TUNEL staining of astrocytes isolated from non-Tg and LRRK2-GS mice 72 h after treatment with  $\alpha$ -Syn, with or without IN1 treatment. Data are presented as means  $\pm$  SD of three independent experiments (\* $p < 0.05$ ).

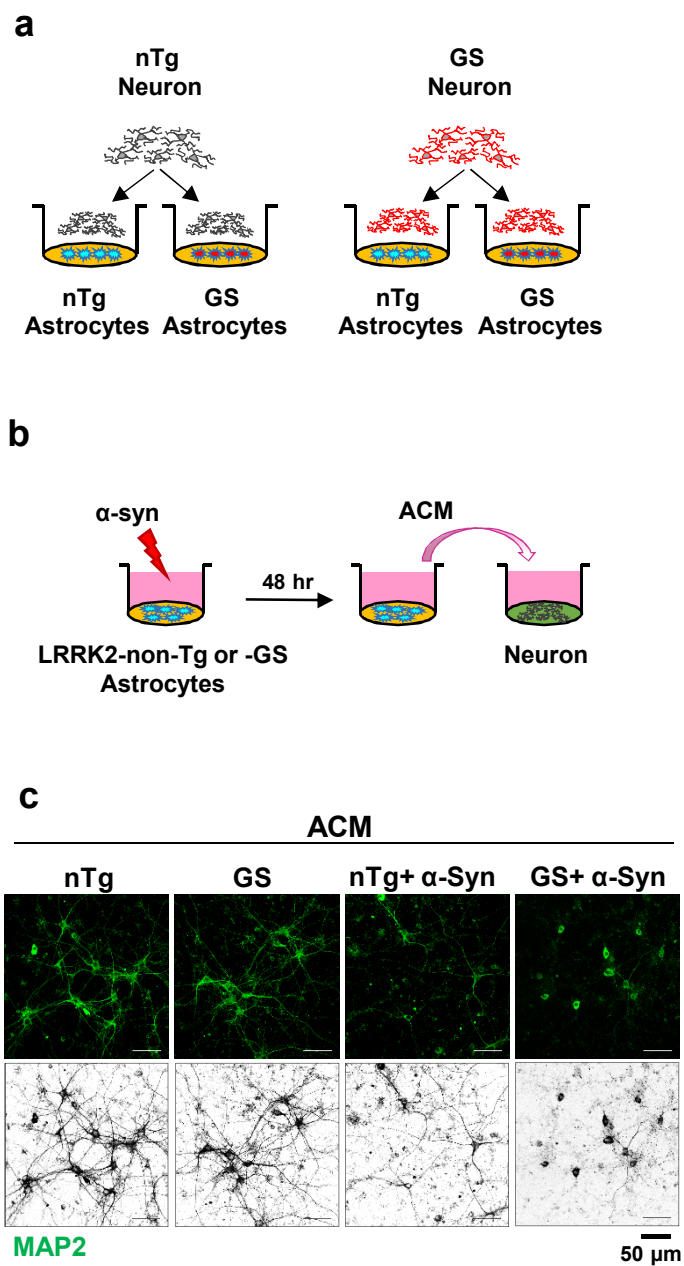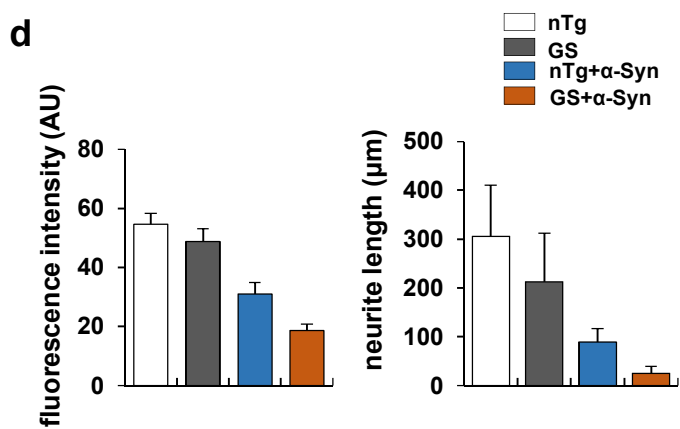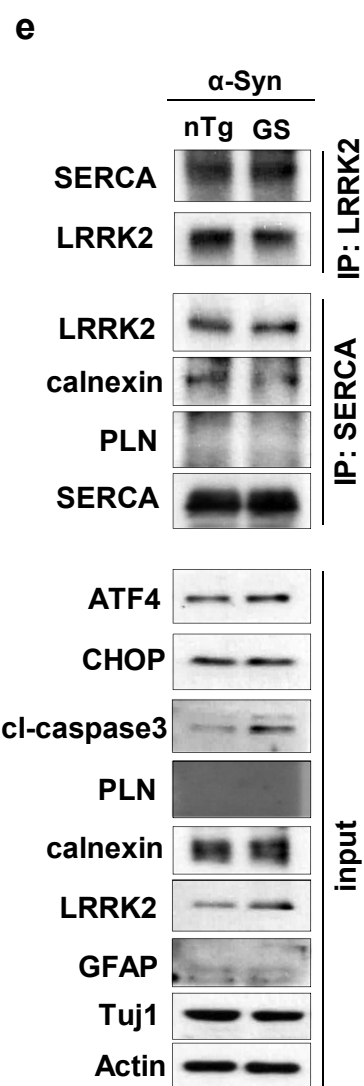

**Fig. S7 LRRK2-GS astrocytes affect neuronal survival.** Related to Figure 6

**a, b** Schematic depiction of co-culture experiments (a) and neuron culture with ACM (b). **c, d** Primary neurons were treated with ACM from  $\alpha$ -synuclein ( $\alpha$ -Syn)-treated non-Tg or LRRK2-GS astrocytes for 48 h. Representative immunofluorescence staining for MAP2 (c), and summary data showing fluorescence intensity of MAP2 per cell (n = 30 cells) and total length of neurites per cell (n = 30 cells) (d). **e** Non-Tg and LRRK2-GS neurons were treated with  $\alpha$ -Syn for 24 h and immunoprecipitated with an antibody against LRRK2 or SERCA, followed by immunoblot analysis with the indicated antibodies. All data are presented as means  $\pm$  SD of three independent experiments.

**Supplementary Table 2.** List of siRNA oligonucleotides

| Transcripts                            | Target sequences          |
|----------------------------------------|---------------------------|
| <b>3'UTR-LRRK2-1</b>                   | 5'-GACAUCAGGCAGUCUCGAU-3' |
| <b>3'UTR-LRRK2-2</b>                   | 5'-UCAGACAUCCUCGUCACUA-3' |
| <b>si-CHOP</b>                         | 5'-CACGUCGAUUUAUCAUGU-3'  |
| <b>* si-14-3-3 <math>\beta</math></b>  | 5'-CAGCUGGUAUUUGUAUCUA-3' |
|                                        | 5'-GUGACUAAACCCUUUACUA-3' |
|                                        | 5'-CAAGCCUGUCUGUAUAUCU-3' |
| <b>* si-14-3-3 <math>\gamma</math></b> | 5'-CGGUAGGGUUCUAAGAAGA-3' |
|                                        | 5'-CUGCACAUGUGACAUUGAA-3' |
|                                        | 5'-CGCUUGUACUGUUUGGAAA-3' |
| <b>* si-14-3-3 <math>\eta</math></b>   | 5'-GGAGACAGUUUGCAAUGAU-3' |
|                                        | 5'-CUGGACUGAUGGUUGCUUU-3' |
|                                        | 5'-GUAACUCUUUGGCUAUUGU-3' |

\* : A mixture of 3 independent siRNA oligonucleotide.

**Supplementary Table 3.** List of primers used for qPCR

| Transcripts | Forward              | Reverse              |
|-------------|----------------------|----------------------|
| ATF4        | TCGATGCTCTGTTTCGAATG | GGCAACCTGGTCGACTTTTA |
| CHOP        | GCATGAAGGAGAAGGAGCAG | CTTCCGGAGAGACAGACAGG |
| GADD34      | GCTGGGTCCTTACCTTACCC | AGGGAGTGGTCACATCTTGG |
| Bim         | TCCGTCTGGTATGGAGAAGG | ACATCGACACAGTGCAGAGC |
| Actin       | GATCTGGCACCACACCTTCT | GGGGTGTTGAAGGTCTCAA  |

**Supplementary Table 4.** List of primary antibodies used in this work

| Primary antibody                  | Supplier (Cat. Number)               | RRID        | Host   | Working dilution |       |
|-----------------------------------|--------------------------------------|-------------|--------|------------------|-------|
|                                   |                                      |             |        | IB               | IF    |
| Anti-phospho-PERK                 | Thermo Fisher Scientific (MA5-15033) | AB_10980432 | rabbit | 1:1000           |       |
| Anti-phospho-eIF2 $\alpha$        | Cell signaling Technology (3398)     | AB_2096481  | rabbit | 1:1000           |       |
| Anti-ATF4                         | Cell signaling Technology (11815)    | AB_2616025  | rabbit | 1:1000           |       |
| Anti-CHOP                         | Thermo Fisher Scientific (MA1-250)   | AB_2292611  | mouse  | 1:1000           | 1:100 |
| Anti-BIM                          | Abcam (ab32158)                      | AB_725697   | rabbit | 1:1000           |       |
| Anti-caspase 12                   | Cell signaling Technology (2202)     | AB_2069200  | rabbit | 1:1000           |       |
| Anti-cleaved caspase 3            | Cell signaling Technology (9664)     | AB_2070042  | rabbit | 1:1000           |       |
| Anti-LRRK2                        | Abcam (ab133474)                     | AB_2713963  | rabbit | 1:1000           |       |
| Anti-LRRK2, C-terminus (N241A/34) | NeuroMab (73253)                     | AB_10671178 | mouse  | 1:1000           | 1:100 |
| Anti-LRRK2, N-terminus (N138/6)   | NeuroMab (75-188)                    | AB_2234791  | mouse  | 1:1000           |       |
| Anti-S935-LRRK2                   | Abcam (ab133450)                     | AB_2732035  | rabbit | 1:1000           |       |
| Anti-SERCA                        | Cell signaling Technology (4388)     | AB_2227684  | rabbit | 1:1000           |       |
| Anti-GADD34                       | Abcam (ab9869)                       | AB_296678   | goat   | 1:1000           |       |
| Anti-calnexin                     | Abcam (ab22595)                      | AB_2069006  | rabbit | 1:1000           | 1:100 |
| Anti-Tom40                        | Santa Cruz Biotechnology (sc-11414)  | AB_793274   | rabbit | 1:1000           |       |
| Anti-pan-14-3-3                   | Santa Cruz Biotechnology (sc-133233) | AB_2016726  | mouse  | 1:1000           |       |
| Anti-14-3-3 $\alpha/\beta$        | Cell signaling Technology (9636)     | AB_560823   | rabbit | 1:1000           |       |
| Anti-14-3-3 $\gamma$              | Cell signaling Technology (5522)     | AB_10827887 | rabbit | 1:1000           |       |
| Anti-14-3-3 $\zeta/\delta$        | Cell signaling Technology (7413)     | AB_10950820 | rabbit | 1:1000           |       |
| Anti-14-3-3 $\epsilon$            | Cell signaling Technology (9635)     | AB_2217758  | rabbit | 1:1000           |       |
| Anti-14-3-3 $\eta$                | Cell signaling Technology (5521)     | AB_10829034 | rabbit | 1:1000           |       |
| Anti-14-3-3 $\tau$                | Cell signaling Technology (9638)     | AB_2218251  | rabbit | 1:1000           |       |
| Anti-Grp78                        | Abcam (ab21685)                      | AB_2119834  | rabbit | 1:1000           |       |
| Anti-Grp94                        | Cell signaling Technology (2104)     | AB_823506   | rabbit | 1:1000           |       |
| Anti-PDI                          | Cell signaling Technology (3501)     | AB_2156433  | rabbit | 1:1000           |       |
| Anti-ERLIN1                       | Cell signaling Technology (2958)     | AB_2293489  | rabbit | 1:1000           |       |
| Anti-TMX1                         | Thermo Fisher Scientific (PA5-17954) | AB_10980336 | goat   | 1:1000           |       |
| Anti-ERp29                        | Abcam (ab11420)                      | AB_298025   | rabbit | 1:1000           |       |
| Anti-DJ1                          | Abcam (ab18257)                      | AB_444361   | rabbit | 1:1000           |       |
| Anti-Calreticulin                 | Cell signaling Technology (12238)    | AB_2688013  | rabbit | 1:1000           |       |
| Anti-PLN                          | Abcam (ab2865)                       | AB_2167905  | mouse  | 1:1000           |       |
| Anti-ERp57                        | Cell signaling Technology (2881)     | AB_2160840  | rabbit | 1:1000           |       |
| Anti-SEPN1                        | Thermo Fisher Scientific (PA5-43082) | AB_2576858  | rabbit | 1:1000           |       |
| Anti-IP3R                         | Cell signaling Technology (3763)     | AB_2129958  | rabbit | 1:1000           |       |
| Anti-Mfn2                         | Cell signaling Technology (11925)    | AB_2750893  | rabbit | 1:1000           |       |
| Anti-cytochrome C                 | Santa Cruz Biotechnology (sc-13156)  | AB_627385   | mouse  | 1:1000           |       |
| Anti- $\beta$ -actin              | Santa Cruz Biotechnology (sc-47778)  | AB_2714189  | mouse  | 1:1000           |       |
| Anti-tubulin                      | Sigma-Aldrich (T6199)                | AB_477583   | mouse  | 1:1000           |       |
| Anti-Flag                         | Sigma-Aldrich (F1804)                | AB_262044   | mouse  | 1:1000           |       |
| Anti-Myc                          | Cell signaling Technology (2278)     | AB_490778   | rabbit | 1:1000           |       |
| Anti-GFAP                         | Cell signaling Technology (3670)     | AB_561049   | mouse  | 1:1000           | 1:100 |
| Anti-Tuj1                         | Abcam (ab78078)                      | AB_2256751  | mouse  | 1:1000           | 1:100 |
| Anti-MAP2                         | Abcam (ab32454)                      | AB_776174   | rabbit |                  | 1:100 |
